# Supplementary material for: A generic simulation cell method for developing extensible, efficient and readable parallel computational models
Source: Copernicus journal article supplement (doi:10.5194/gmd-8-473-2015), 2015-03-06
Supplement: Supplementary file 1 [file gmd-8-473-2015-supplement.zip]

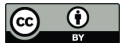

## *Supplement of*

# **A generic simulation cell method for developing extensible, efficient and readable parallel computational models**

**I. Honkonen**

*Correspondence to:* I. Honkonen (ilja.j.honkonen@nasa.gov)

- gmd-8-473-2015-supplement-cover-letter.pdf
- gensimcell-1.0
  - CREDITS
  - Doxyfile
  - INSTALL
  - LICENSE
  - Makefile
  - README
  - TODO
  - documentation
    - \* DoxygenLayout.xml
  - examples
    - \* advection
    - \* combined
    - \* custom\_variable.cpp
    - \* game\_of\_life
    - \* iteration\_over\_variables.cpp
    - \* particle\_propagation
  - makefiles
    - \* homedir
    - \* macosx\_macports
  - source
    - \* gensimcell.hpp
    - \* gensimcell\_impl.hpp
    - \* gensimcell\_transfer\_policy.hpp

- \* get\_var\_mpi\_datatype.hpp
- \* operators.hpp
- \* type\_support.hpp
- tests
  - \* check\_true.hpp
  - \* compile
  - \* parallel
  - \* serial
